# Supplementary material for: Oncotype DX recurrence score implications for disparities in chemotherapy and breast cancer mortality in Georgia
Source: PubMed Central journal article supplement (PMC6763428; doi:10.1038/s41523-019-0129-3), 2019-09-26
Supplement: 41523_2019_129_MOESM1_ESM.pdf [file 41523_2019_129_MOESM1_ESM.pdf]

**Oncotype DX recurrence score implications for disparities in chemotherapy and breast cancer mortality in Georgia**

Lindsay J. Collin,<sup>1</sup> Ming Yan<sup>1</sup>, Renjian Jiang <sup>1</sup>, Kevin C Ward<sup>1</sup>, Brittany Crawford<sup>2</sup>, Mylin A Torres<sup>3,4</sup>, Keerthi Gogineni<sup>5</sup>, Preeti D Subhedar<sup>6</sup>, Samantha Puvanesarajah<sup>7</sup>, Mia M Gaudet<sup>7</sup>, Lauren E McCullough<sup>1</sup>

**Supplementary Table 1.** Multivariable-adjusted odds ratios (OR) and 95% confidence intervals (95% CI) for receipt of chemotherapy according to race and Oncotype DX recurrence score (ODX RS) group among non-Hispanic White (NHW) and non-Hispanic Black (NHB) women diagnosed with breast cancer, an Oncotype DX recurrence score from Genomic Health, Inc., 2010–2014 and registered with the Georgia Cancer Registry, excluding those with 1) lymph node positive (1–3 LN+) breast cancer and 2) an ODX RS from GCR and no corresponding score from Genomic Health.

| ODX RS                        | Chemotherapy |      |     |     | Exclude LN+ 1–3 (n=569) | Exclude ODX RS from GCR (n=329) |
|-------------------------------|--------------|------|-----|-----|-------------------------|---------------------------------|
|                               | NHW          |      | NHB |     |                         |                                 |
|                               | No           | Yes  | No  | Yes |                         |                                 |
| Low                           | 2212         | 64   | 580 | 20  | 1.08 (0.65, 1.81)       | 0.96 (0.55, 1.67)               |
| Intermediate                  | 887          | 419  | 256 | 146 | 1.04 (0.81, 1.33)       | 1.01 (0.79, 1.31)               |
| High                          | 54           | 279  | 32  | 143 | 0.69 (0.42, 1.14)       | 0.61 (0.33, 1.13)               |
| <b>Age and stage-adjusted</b> |              |      |     |     |                         |                                 |
| No Score                      | 3251         | 1235 | 877 | 600 | 1.33 (1.14, 1.54)       |                                 |

**Supplementary Table 2.** Multivariable-adjusted hazard ratios (HR) and 95% confidence intervals (95% CI) for breast cancer specific death according to race and Oncotype DX recurrence score (ODX RS) group among non-Hispanic White (NHW) and non-Hispanic Black (NHB) women diagnosed with breast cancer with an Oncotype DX recurrence score from Genomic Health Inc., 2010–2014 and registered with the Georgia Cancer Registry, excluding those with 1) lymph node positive (1–3 LN+) breast cancer and 2) an ODX RS from GCR and no corresponding score from Genomic Health.

| ODX RS       | NHW Events | NHB Events | Exclude LN+ 1–3 (n=569) | Exclude ODX RS from GCR (n=329) |
|--------------|------------|------------|-------------------------|---------------------------------|
| Low          | 16         | 12         | 2.96 (1.38, 6.37)       | 3.11 (1.38, 6.99)               |
| Intermediate | 39         | 17         | 1.40 (0.79, 2.48)       | 1.43 (0.80, 2.54)               |
| High         | 14         | 15         | 1.94 (0.92, 4.09)       | 2.48 (1.07, 5.76)               |

**Supplementary Table 3.** Age-adjusted and multivariable-adjusted hazard ratios (HR) and 95% confidence intervals (95% CI) for breast cancer specific death according to race and Oncotype DX recurrence score (ODX RS) group using TAILORx cutpoints among non-Hispanic White (NHW) and non-Hispanic Black (NHB) women diagnosed with breast cancer with an Oncotype DX recurrence score, 2010–2014 and registered with the Georgia Cancer Registry (n=5750).

| ODX RS           | BC mortality | NHW               | NHB          | Stratum Specific   |                    |                                 |                                  |
|------------------|--------------|-------------------|--------------|--------------------|--------------------|---------------------------------|----------------------------------|
|                  |              | HR (95% CI)       | BC mortality | HR (95% CI)        | RERI (95% CI)      | Age-adjusted                    | Age and stage adjusted           |
| Low/Intermediate | 50           | reference         | 27           | 2.08 (1.29, 3.33)  | reference          | 2.08 (1.29, 3.33)               | 2.10 (1.31, 3.37)                |
| High             | 30           | 3.52 (2.23, 5.55) | 23           | 6.32 (3.84, 10.43) | 1.73 (-1.28, 4.74) | 1.80 (1.04, 3.11)               | 1.85 (1.07, 3.21)                |
|                  |              |                   |              |                    |                    | <i>P</i> -interaction = 0.69568 | <i>P</i> - interaction = 0.73121 |

**Supplementary Table 4:** Agreement between Oncotype DX recurrence scores from the Georgia Cancer Registry and Genomic Health Inc., among non-Hispanic White and non-Hispanic Black women diagnosed with a HR+/HER2– breast cancer in Georgia (2010–2014).

| Georgia Cancer Registry | Genomic Health |      |              |      |
|-------------------------|----------------|------|--------------|------|
|                         | Missing        | Low  | Intermediate | High |
| Missing                 | 6331           | 867  | 483          | 102  |
| Low                     | 109            | 2149 | 16           | 0    |
| Intermediate            | 60             | 11   | 1294         | 6    |
| High                    | 160            | 130  | 72           | 291  |
